# Supplementary material for: EULAR points to consider for conducting clinical trials and observational studies in individuals at risk of rheumatoid arthritis
Source: HighWire-hosted journal article supplement (doi:10.1136/annrheumdis-2021-220884), 2021-08-06
Supplement: annrheumdis-2021-220884supp001_data_supplement.pdf [file annrheumdis-2021-220884supp001_data_supplement.pdf]

## Supplementary materials: Flow charts

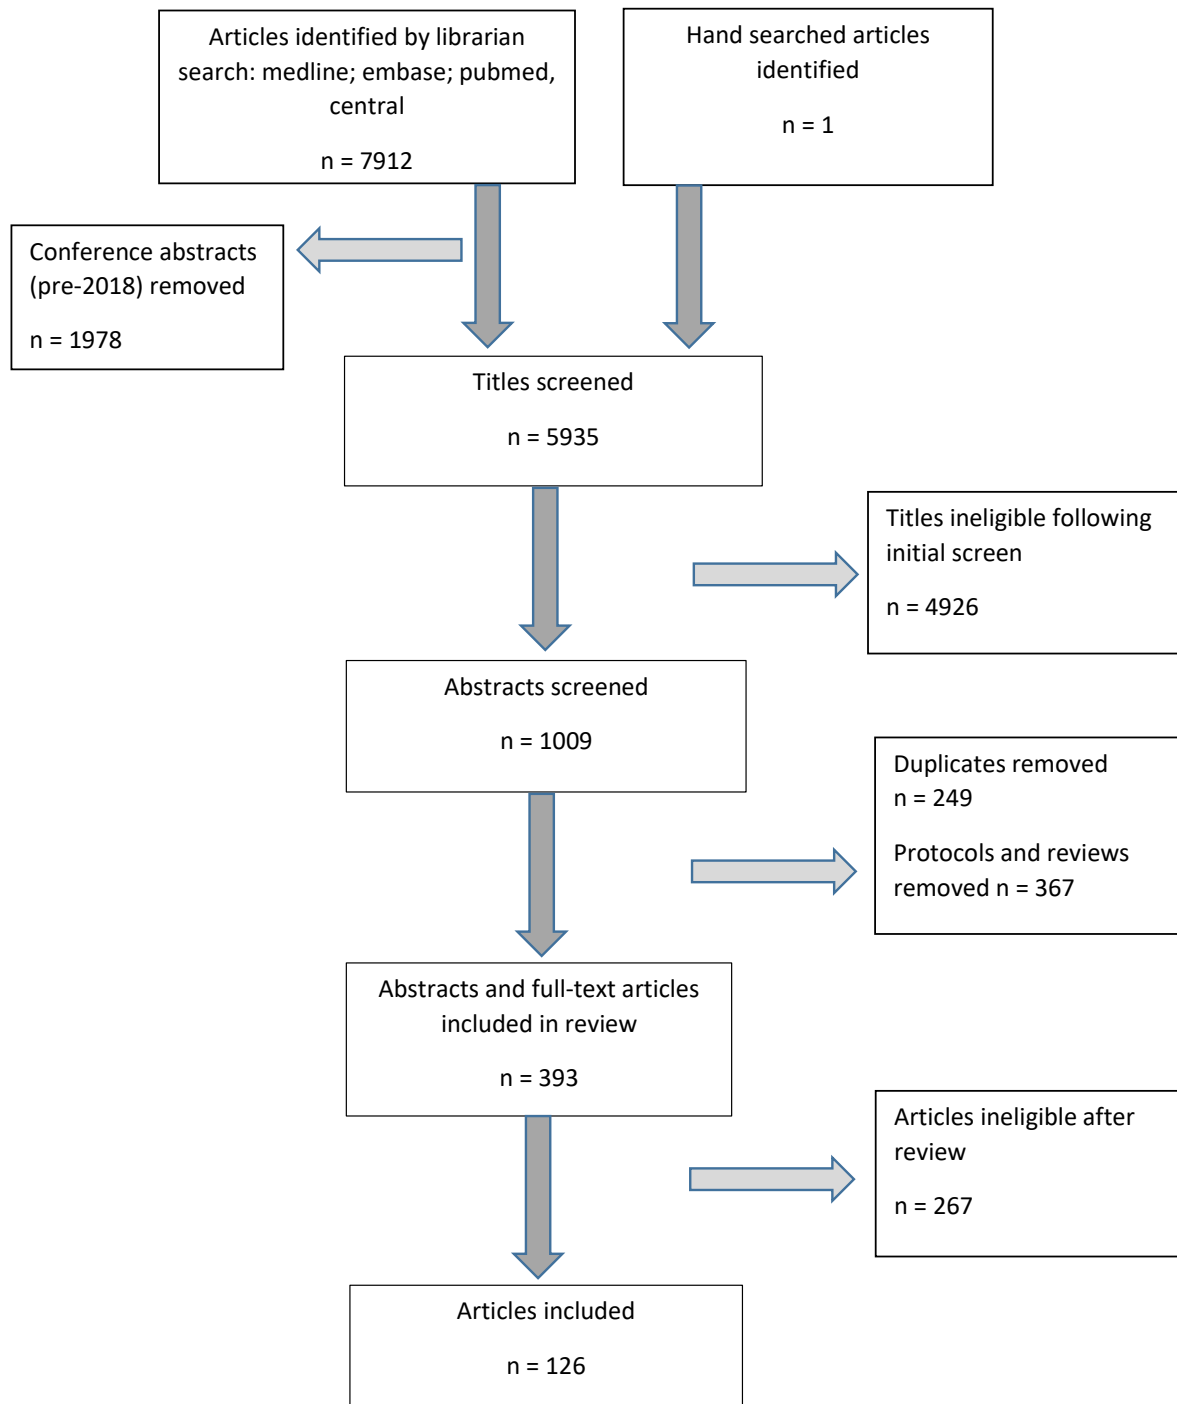

**Supplementary figure 1:** Summary of article selection process for question 1: 'In clinical studies involving individuals at risk of RA, which populations should be included and what study endpoints should be used?'

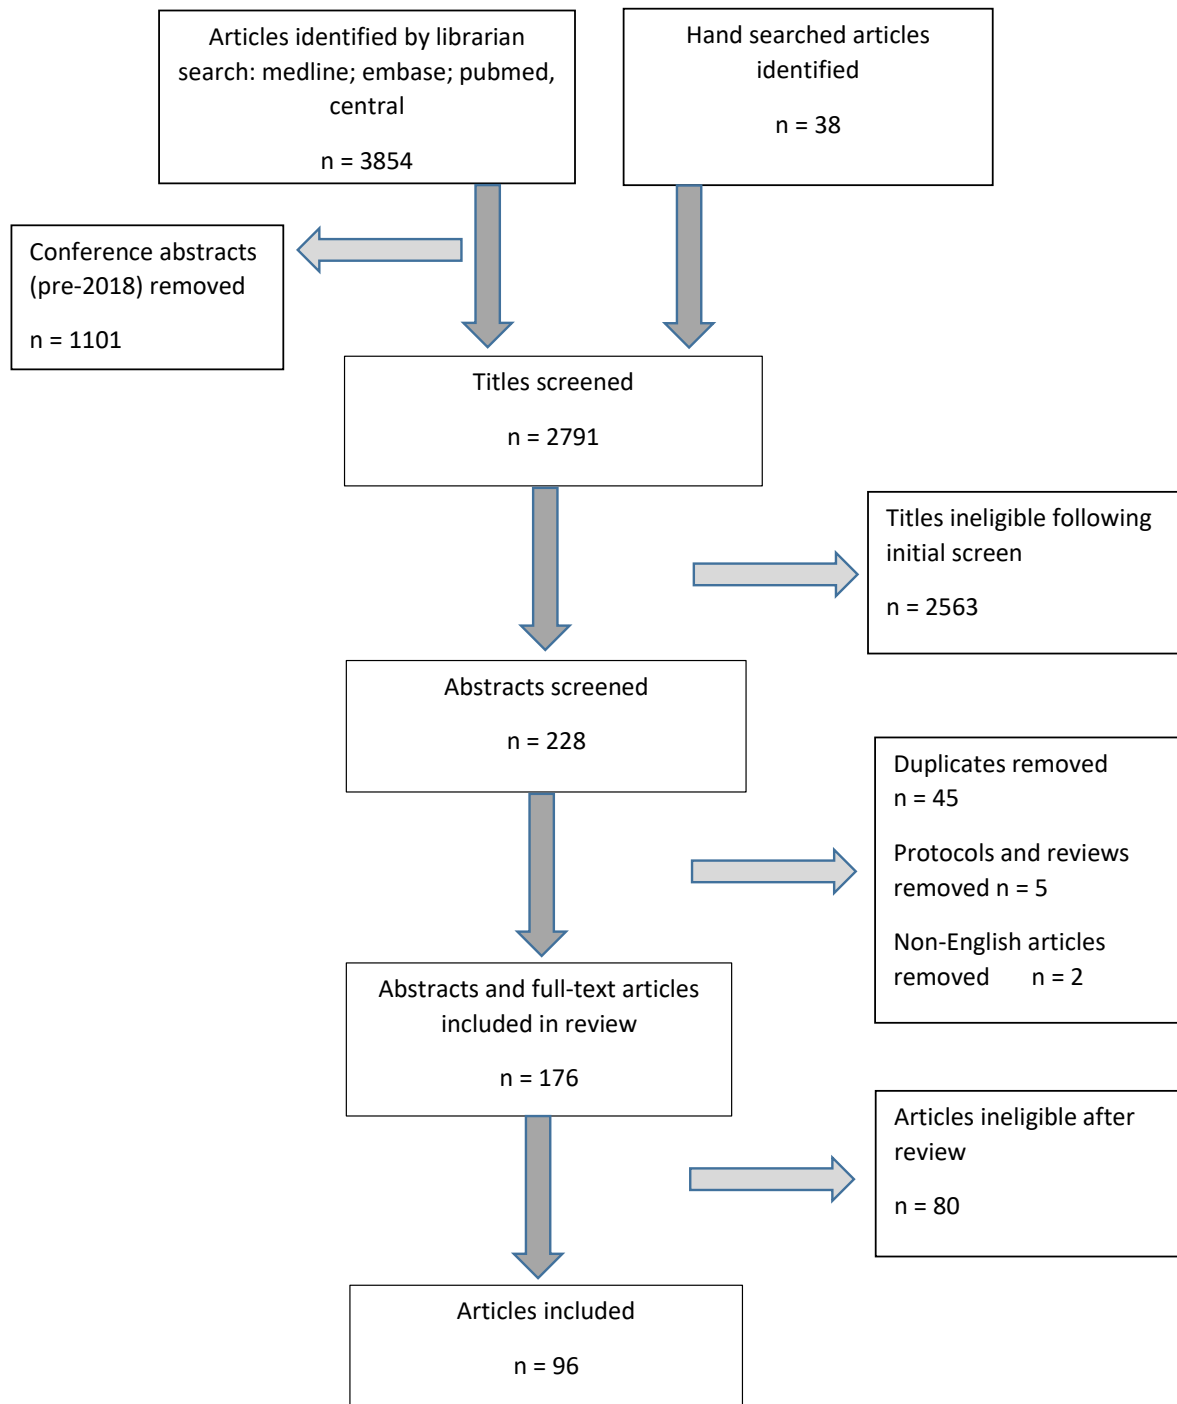

**Supplementary figure 2:** Summary of article selection process for question 2: 'In individuals at risk of rheumatoid arthritis (RA), is there core set of risk factors and how frequently should they be measured?'

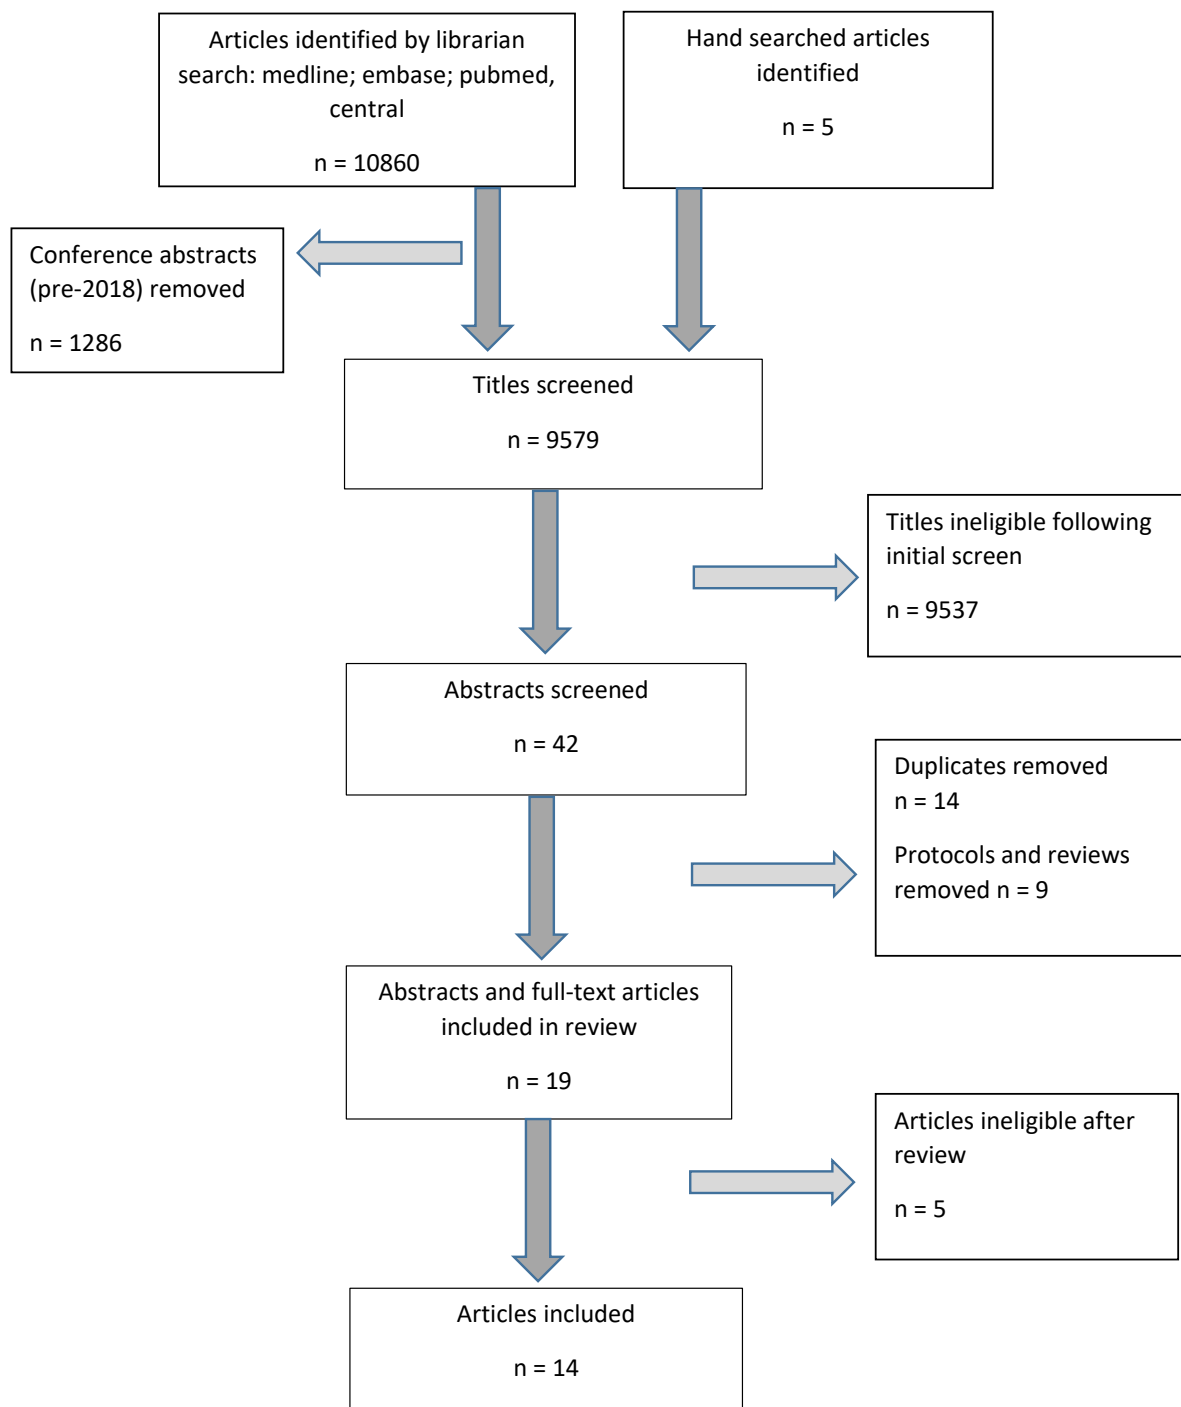

**Supplementary figure 3:** Summary of article selection process for question 3: 'In individuals at risk of RA, does risk-factor driven intervention alter risk of progression?'

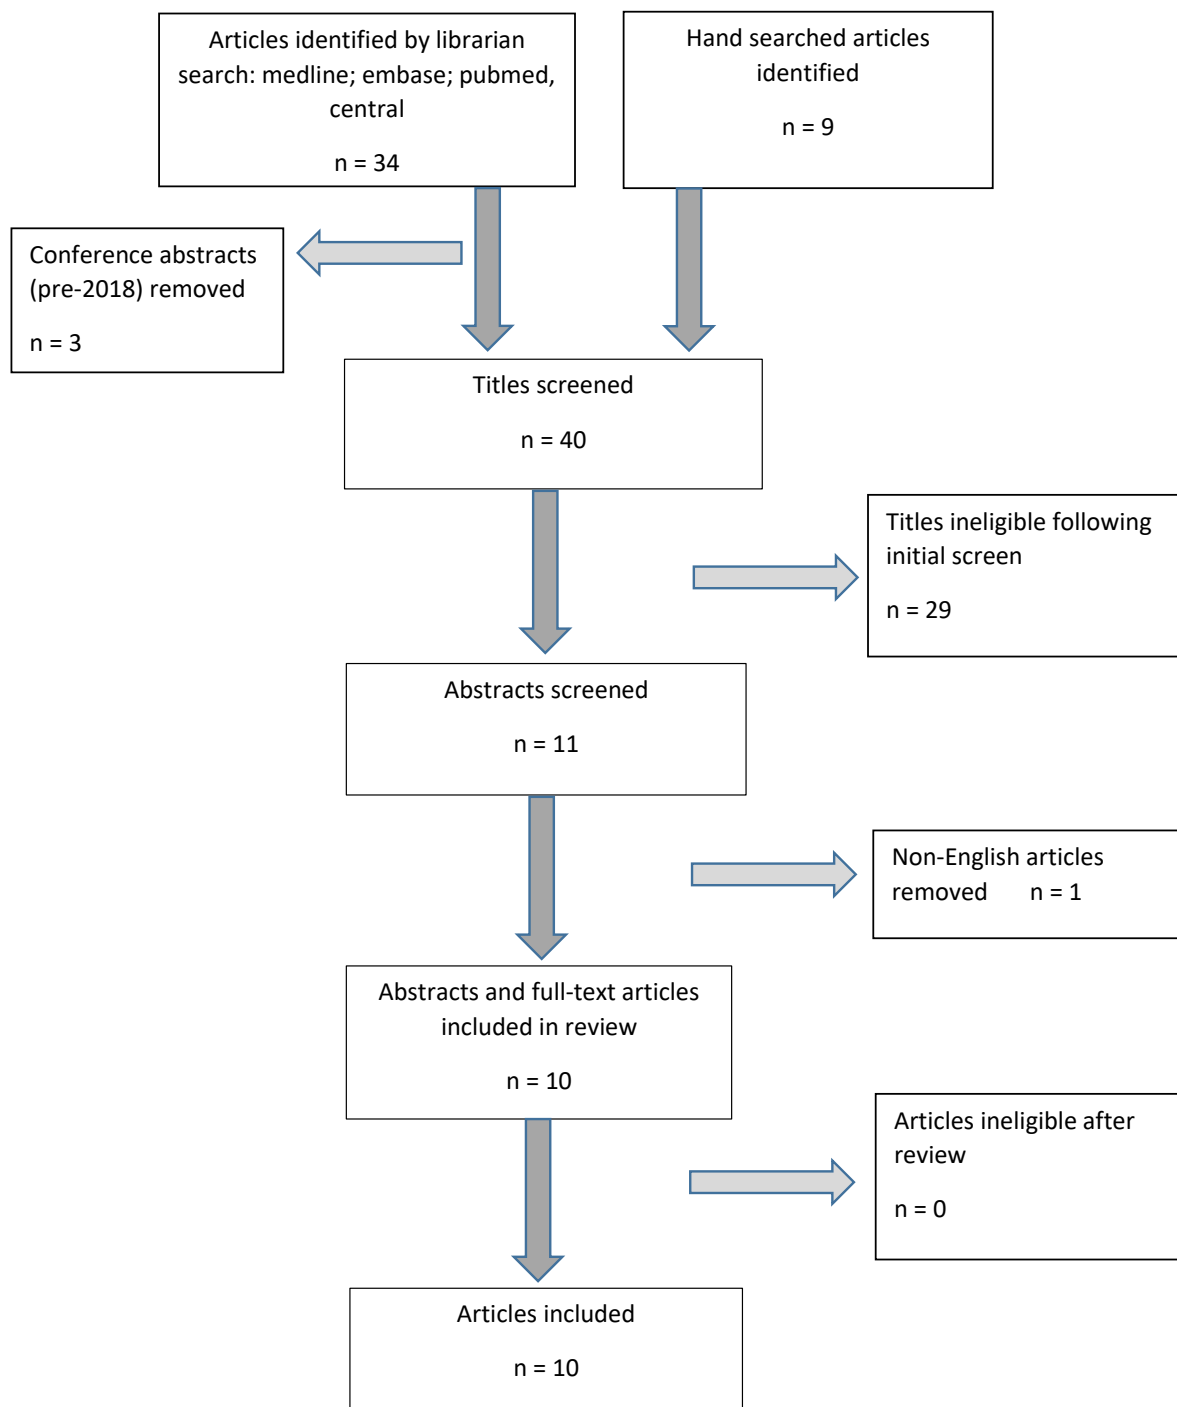

**Supplementary figure 4:** Summary of article selection process for question 4: 'Is there benefit in informing individuals at risk of RA about their risk of developing RA and offering preventative treatment?'
